# A genomic island of *Streptomyces coelicolor* with the self-contained regulon of an ECF sigma factor

Camilla M. Kao,<sup>a,□#</sup> Nitsara Karoonuthaisiri,<sup>a,□1</sup> David Weaver,<sup>a,□2</sup> Jonathan A. Vroom,<sup>a,□3</sup>

Shuning A. Gai,<sup>a,□4</sup> Mai-Lan Ho,<sup>a,□5</sup> and Kedar G. Patel<sup>a</sup>

<sup>a</sup>Department of Chemical Engineering, Stanford University, Stanford, California, USA

Running Head: GI 6 of *S. coelicolor* with ECF sigma factor regulon

#Address correspondence to Camilla M. Kao, [ckao.science@gmail.com](mailto:ckao.science@gmail.com).

□ Present Address: School of Engineering, Stanford University, Stanford, California, USA

□1 Present Address: Biosensing Technology Research Unit, National Center for Engineering and Biotechnology, Pathum Thani, Thailand

□2 Present Address: ERM: Environmental Resources Management, San Francisco, California, USA

□3 Present Address: Molecular and Cellular Engineering, Codexis, Redwood City, California, USA

□4 Present Address: Molecular Biology, Prothena Biosciences, South San Francisco, California, USA

□5 Present Address: Department of Radiology, Mayo Clinic, Rochester, Minnesota, USA

N.K. and D.W. contributed equally to this work.

Word count for the abstract: 400

Word count for the text: 2897

## 1 **Abstract**

2 Streptomyces constitute the largest genus of actinobacteria, living predominantly in soil and  
3 decaying vegetation. The bacteria are widely known for their filamentous morphologies and  
4 their capacity to synthesize antibiotics and other biologically active molecules. More than a  
5 decade ago, we and others identified 22 genomic islands that *Streptomyces coelicolor* M145  
6 possesses and other *Streptomyces* strains lack. One of these genomic islands, Genomic Island  
7 (GI) 6, encodes an extracytoplasmic function (ECF) sigma factor that we were characterizing in  
8 separate work. Here we report that artificial induction of the ECF sigma factor, which is  
9 encoded by SCO3450, causes the transcription of approximately one-fourth of GI 6, or ~26  
10 mostly contiguous genes, to increase. More than half of the regulon encodes putative enzymes  
11 involved in small molecule metabolism. A putative haloacid dehalogenase is present. Genes  
12 encoding two putative anti-sigma factors flank SCO3450, the three genes residing within the

13 regulon. Our data suggest that the ECF sigma factor and its regulon are a self-contained  
14 transcriptional unit that can be transferred by horizontal gene transfer. To our knowledge, only  
15 one other example has been identified of an ECF sigma factor and its contiguous regulon  
16 appearing to be transferrable by horizontal gene transfer [18,19]. Because the regulon appears  
17 not to be induced by the 44 growth conditions recently examined by Byung-Kwan Cho and  
18 colleagues [20], if it confers fitness to *S. coelicolor*, the regulon likely does so in as-yet unknown  
19 situations. Those situations might range from scavenging to detoxification to even  
20 communication within microbial communities.

21

22 **IMPORTANCE** *Streptomyces* bacteria grow as hyphae that colonize soil and differentiate into  
23 spores when nutrients become scarce. In their terrestrial habitats, the bacteria encounter  
24 diverse conditions. Presumably so that the bacteria can cope with those conditions, the  
25 chromosomes of streptomycetes are highly dynamic, varying greatly in structure not only  
26 between species but also between closely related strains of a single species. The bacteria also  
27 have large numbers of extracytoplasmic function (ECF) sigma factors, which undoubtedly help  
28 the microorganisms respond to the plethora of challenges coming from the environment. This  
29 work illustrates these two threads of *Streptomyces* biology dovetailing: Genetic adaptability  
30 through horizontal gene transfer seems to have enabled *Streptomyces coelicolor* to acquire a  
31 self-contained transcriptional unit that consists of an ECF sigma factor and its regulon. The  
32 suggested facile movement of the regulon between microbial hosts indicates the value of the  
33 metabolism of small molecules possibly mediated by the regulon.

34

## 35 **Introduction**

36 Researchers began studying *Streptomyces* genetics in the second half of the 20th century  
37 because of the filamentous morphologies and biosynthetic capacities of the bacteria [1]. Many  
38 of the *Streptomyces* strains that were studied belong to a group of closely related “blue”  
39 streptomycetes that had been given various names, but probably should all have the same  
40 name [2]. During the early 2000's, we characterized the genomes of six of these “blue” strains  
41 by using DNA microarrays: the sequenced strain [3], *S. coelicolor* M145, which derives from *S.*  
42 *coelicolor* A3(2), which in turn derives from Waksman's strain 3443 [4]; Sermonti's SE1 (John  
43 Innes (JI) strain 1152) [5]; Bradley's S199 (JI 1153) [6]; *S. lividans* 66 (JI 1326) [7]; *S. lividans*  
44 ISP5434 (JI 2896), which contains the plasmid pIJ101 [8]; and *S. violaceoruber* SANK95570 (JI  
45 3034), which contains the plasmid pSV1 that encodes the biosynthetic genes for the antibiotic  
46 methylenomycin [9]. That study was described in the doctoral dissertation of co-author David  
47 Weaver [10]. Similar findings were reported by Jayapal et al., who examined *S. coelicolor* M145  
48 and *S. lividans* TK21 [11].

49

50 By comparing the genome of *S. coelicolor* M145 to the five wild type genomes by using DNA  
51 microarrays, we identified 22 sets of contiguous genes in *S. coelicolor* M145 that are absent in  
52 the wild type strains [10]. We designated these genes Genomic Islands (GIs) 1 to 22. Fig. S1, Fig.  
53 S1, and Fig. S3 show the GIs. The sizes of the GIs range from 3 kb to 150 kb and the number of  
54 ORFs within them from 3 to 148. *S. coelicolor* M145 likely acquired the 22 GIs by horizontal

55 gene transfer, because they have the following characteristics: Direct repeats flank most of the  
56 GIs; the GIs contain regions with low G + C content; the GIs encode transposable elements such  
57 as invertases, recombinases, and transposons, as well as plasmid-related proteins; some GIs  
58 appear to have inserted into tRNA sequences; and the GIs have slightly lower gene expression  
59 during exponential growth [10,11]. We found that different wild type strains lack different GIs  
60 and have different boundaries at the sites corresponding to the GIs in *S. coelicolor* M145. We  
61 also identified DNA that the wild type strains possess and that *S. coelicolor* M145 lacks. Some of  
62 that DNA (corresponding to GIs 8, 14, 17, 18, and 19 in *S. coelicolor* M145) might be large  
63 segments, because we were unable to amplify the DNA by PCR [10]. The genomic islands have a  
64 relatively uniform distribution across the chromosome of *S. coelicolor* M145, with a slight  
65 abundance in the right chromosome arm [10,11].

66

67 A sigma factor is a specialized unit of RNA polymerase that permits the multisubunit enzyme to  
68 initiate transcription selectively. Extracytoplasmic function (ECF) sigma factors constitute the  
69 most abundant, smallest, and most divergent group of sigma factors [12]. Their name derives  
70 from many of their members having roles in sensing and responding to signals generated  
71 outside of the cell or in the cell membrane [13]. The genome of *S. coelicolor* M145 encodes 63  
72 sigma factors, of which 49 belong to the ECF group [3]. During the early 2000's, we sought to  
73 identify regulons of *S. coelicolor* sigma factors by overexpressing each one individually and  
74 analyzing the response of the transcriptome by using DNA microarrays. The ECF sigma factor  
75 encoded by SCO3450 was evaluated as part of that work. While we were unaware of this fact at  
76 that time, SCO3450 is located in GI 6 [10].

77

78 The ECF sigma factor encoded by SCO3450 belongs to the subgroup ECF01 as classified by  
79 Thorsten Mascher and colleagues in 2009 [14]. This subgroup includes RpoE-like sigma factors,  
80 of which the best studied is  $\sigma^W$  of *Bacillus subtilis*. Members of the ECF01 subgroup are widely  
81 distributed throughout bacterial phyla, but are absent in most actinobacteria, the phylum  
82 which includes the genus *Streptomyces* [15]. ECF01 sigma factors have been characterized  
83 experimentally to be involved in responses to envelope stress and the production and  
84 detoxification of antimicrobial compounds [14].

85

## 86 **Results and Discussion**

87 *Genomic Island 6 encodes an ECF sigma factor and the regulon of the sigma factor*

88 Table 1 lists the five wild type *Streptomyces* strains that we studied that lack GI 6 [10].

89

90 Fig. 1 shows the boundaries of GI 6 (the left-hand columns) and the levels of transcripts, as  
91 measured by microarrays, after artificial induction of SCO3450 in the strain *S. coelicolor* M600  
92 growing exponentially in a liquid culture (the right-hand columns) [16]. Fifteen minutes after we  
93 induced the sigma factor, transcripts of approximately one-fourth of the genes in GI 6 increased  
94 in abundance. The genes numbered ~26: SCO3437 and SCO3442-3465; SCO3478 is an induced  
95 gene located 14 kb away from the other genes. Cross-hybridization does not explain the result  
96 for SCO3478 because the gene, which encodes a dehydrogenase, lacks sequence similarity to

97 other *S. coelicolor* genes. SCO3450 is located among the induced genes (Fig. 1, arrow; Fig. S4).

98 Together these data suggest that the ECF sigma factor and its regulon are a self-contained

99 transcriptional unit that can be transferred by horizontal gene transfer.

100

101 To our knowledge, the only other example of an ECF sigma factor and its regulon appearing to

102 be transferrable by horizontal gene transfer is the system for cobalt and nickel resistance in the

103 bacterium *Cupriavidus metallidurans* CH34 [18,19]. There, the plasmid pMOL28 contains six *cnr*

104 genes that are organized in two adjacent operons of three genes each. The gene *cnrH* encodes

105 the ECF sigma factor CnrH. Deletion and complementation of *cnrH* indicated that CnrH is

106 essential for the regulation of the *cnr* system. When CnrH was present but the periplasmic

107 sensor CnrX and the anti-sigma factor CnrY were absent, high-level constitutive expression was

108 observed for the *cnr* genes [18].

109

110 *The regulon of the ECF sigma factor contains conserved putative -35 and -10 promoter regions*

111 Byung-Kwan Cho and colleagues reported in 2016 transcription start sites of *S. coelicolor* genes

112 induced by 44 growth conditions [20]. Those conditions included growth in rich media and

113 many kinds of minimal media, growth in the liquid phase and on solid media, rapid growth to

114 stationary phase, and several kinds of shocks. That study did not identify transcription start

115 sites for the regulon of the ECF sigma factor encoded by SCO3450. This observation indicates

116 that the regulon is not induced by the growth conditions examined by Jeong et al. [20]. Perhaps

117 *S. coelicolor* uses the regulon for circumstances that are not replicated in the laboratory, such  
118 as interactions in the natural environment among different microbial species.

119  
120 We used the bioinformatics tool PromoterHunter [21], combined with visual inspection of  
121 nucleotide sequences, to identify possible -35 and -10 promoter regions in the regulon of the  
122 ECF sigma factor. The conserved sequences for the -35 and -10 promoter regions might be  
123 AACGG and CG, respectively (Fig. 2). The promoters of 14 genes contain these sequences  
124 exactly. The data suggest that operons might comprise SCO3445 to SCO3444, SCO3448 to  
125 SCO3446, SCO3455 to SCO3452, and SCO3463 to SCO3465 (see Fig. S4). Alternatively, genes not  
126 listed in Fig. 2 might have promoters with less conserved -35 and -10 regions. Note that  
127 SCO3460 and SCO3478 do not possess the highly conserved promoter regions (see Fig. S4). In  
128 addition, that SCO3438 has the conserved promoter regions supports the notion that this gene  
129 belongs to the regulon of the ECF sigma factor. In Fig. 1, the lack of data for SCO3438 from all of  
130 the microarray hybridizations indicates that its spot on the microarrays was functioning poorly.

131  
132 *The regulon of the ECF sigma factor encodes putative enzymes for small molecule metabolism*

133 Recently we updated the annotations of the regulon of the ECF sigma factor by using  
134 EnsemblBacteria [22] and UniProt BLASTS [23]. Of the approximately 26 genes in the regulon,  
135 15 encode putative enzymes for small molecule metabolism. 11 genes encode putative  
136 membrane and transport proteins. Four genes encode putative regulatory proteins. Four of the



137 26 genes fall into two categories. Only one gene lacks a putative function. Table S1 lists the  
138 annotations of each gene in the regulon.

139

#### 140 *Enzymes encoded by the regulon of the ECF sigma factor*

141 Table 2 lists the types of enzymes encoded by the regulon of the ECF sigma factor. The table  
142 excludes SCO3461 and SCO3462, because they lack gene expression data (Fig. 1, right-hand  
143 columns).

144

145 The putative enzymes fall into three general groups. One group possibly catalyzes the cleavage  
146 of small molecules. The group includes a glycoside hydrolase, a nucleoside phosphorylase, and  
147 a haloacid dehalogenase. A second group of enzymes might catalyze oxidation and reduction  
148 reactions. The group includes a glutaredoxin-like protein, two oxidoreductases, and a  
149 dehydrogenase. The third group of enzymes might catalyze transfer reactions. The group  
150 includes two methyltransferases, perhaps a phosphatidyltransferase, and two nucleotide-  
151 diphospho sugar transferases. A final gene, SCO3445, encodes a small membrane protein that  
152 has 30-50% identity to small regions of seven larger proteins, a set which includes several  
153 enzymes.

154

155 The composition of the enzymes in the regulon of the ECF sigma factor suggests that the  
156 regulon might help to metabolize small molecules. A mixture of compounds might be being

157 degraded: sugars, nucleosides and nucleotides, and lipids for the purposes of energy and  
158 biosynthesis; halogenated molecules for detoxification. Because the regulon encodes a set of  
159 putative enzymes with diverse substrates, the small molecules might be coming from the  
160 environment, for example, from neighboring cellular compartments or hyphae that are lysing  
161 due to hostile conditions.

162

163 Haloacid dehalogenases (HADs) belong to a large superfamily of hydrolases with diverse  
164 substrate specificity [24]. Type II HADs catalyze the hydrolytic dehalogenation of small L-2-  
165 haloalkanoic acids to yield the corresponding D-2-hydroxyalkanoic acids [25]. Because many  
166 *Streptomyces* bacteria produce halogenated antibiotics [26,27], the dehalogenase encoded by  
167 SCO3446 might serve to defend *S. coelicolor* against competitors in the environment by helping  
168 to catabolize antibiotics.

169

170 The following pairs of genes have no significant similarity, such that no cross-hybridization on  
171 the microarrays should have occurred: SCO3452 and SCO3449, which encode the  
172 methyltransferases; SCO3443 and SCO3460, which encode the oxidoreductases; and SCO3464  
173 and SCO3465, which encode the nucleotide-diphospho-sugar transferases (Table 2).

174

175 *Anti-sigma factors within the regulon of the ECF sigma factor*

176 Two genes that possibly encode anti-sigma factors flank SCO3450, the gene encoding the ECF  
177 sigma factor. The gene product of SCO3451 encodes a 103-amino-acid protein. A UniProt BLAST  
178 shows that the protein has approximately 40% identity with varying coverages to putative anti-  
179 sigma factors of other bacterial species, including putative transmembrane anti-sigma factors.  
180 The Constrained Consensus TOPology (CCTOP) prediction server [28] predicts with a reliability  
181 of 95.9069 that SCO3451 encodes a protein with one transmembrane segment (Fig. S5). The  
182 gene product of SCO3451 also contains a putative zinc-finger found in some anti-sigma factor  
183 proteins (Fig. S6). This zinc finger domain overlaps with the predicted transmembrane domain.

184

185 SCO3449 encodes a 106-amino-acid protein. A UniProt BLAST shows that the protein has  
186 approximately 40% identity with coverages around 50% to putative anti-sigma factors in other  
187 bacterial species, including putative transmembrane anti-sigma factors. However, according to  
188 CCTOP, the protein does not contain a transmembrane domain. Like the putative anti-sigma  
189 factor encoded by SCO3451, the putative anti-sigma factor encoded by SCO3449 contains a  
190 possible zinc-finger found in some anti-sigma factor proteins (Fig. S7).

191

192 Microarray data are lacking for the expression of SCO3449 (Fig. 1, right-hand columns), such  
193 that inferences about the role of this gene in comparison to those of the induced genes should  
194 be made with caution. However, because microarray data are available for this gene in the  
195 hybridizations that identified the genomic islands (Fig. 1, left-hand columns), the spot on the  
196 microarrays that represented this gene was likely intact. It is possible that a low abundance of

197 transcripts of SCO3449 in both the reference and experimental samples of mRNA produced  
198 poor signals from the microarray spot of the gene.

199

200 *Membrane and transport proteins encoded by the regulon of the ECF sigma factor*

201 Four contiguous genes in the regulon of the ECF sigma factor, SCO3453 to SCO3456, encode  
202 proteins that likely constitute an ABC transporter system. UniProt BLASTS show that all of the  
203 proteins have 45-50% identity with coverages greater than 95% to homologs with putative  
204 functions in spermidine and putrescine transport in other bacterial species. In particular, the  
205 species include *Geodermatophilus* and *Wenxinia*. Spermidine is a polyamine involved in cellular  
206 metabolism that can be used to stimulate RNA polymerase. Putrescine attacks S-adenosyl  
207 methionine and converts it to spermidine [29].

208

209 The putative transporters Sco3454 and Sco3455 have 34% identity with each other, the  
210 coverage being 44% between the C-terminal portions of the proteins.

211

212 *Genomic Island 6 consists of four segments with transposases at their boundaries*

213 In addition to the regulon of the ECF sigma factor, we updated the annotations of the other  
214 genes of Genomic Island 6 by using EnsemblBacteria and UniProt BLASTS (Table S2). In the  
215 table, the location of the regulon is denoted by the words "REGULON HERE."

216

217 The length of GI 6 is 108 kb. The genomic island consists of four segments of DNA bounded by  
218 transposases (Table S2, pink color). Three of the four segments have coherent putative  
219 functions: the oxidation and reduction of copper (Table S2, blue color); a characterized agarase  
220 encoded by *dagA* [30,31]; and the utilization of sugars (Table S2, yellow color). Included in the  
221 latter segment are a putative *lacI*-family transcriptional regulator and a putative  $\beta$ -  
222 galactosidase. A large fourth segment encodes putative enzymes and many hypothetical  
223 proteins.

224

225 The coherent functions of at least three of the four segments of GI 6 indicate that significant  
226 portions of the island might be “active.” If so, the regulon of the ECF sigma factor is likely active  
227 as well. While a nucleotide blast of the regulon of the ECF sigma factor yielded no similar  
228 segments of DNA in other sequenced organisms, the value to *S. coelicolor* of the regulon for as-  
229 yet unknown reasons is indicated by the presence of the regulon on a genomic island. It would  
230 be interesting to determine how common the regulon is among natural populations of  
231 microbes and whether the regulon moves easily between hosts.

232

## 233 **Materials and Methods**

### 234 *Construction of a S. coelicolor strain that overexpresses SCO3450*

235 SCO3450, the gene which encodes the ECF sigma factor harbored by GI 6, was amplified by PCR  
236 and cloned into the conjugative plasmid pIJ6902 [32] by using the restriction sites *NdeI* and

237 *Bgl*II. These restriction sites placed the gene immediately downstream of the thiostrepton-  
238 inducible promoter *tipAp*. The resulting plasmid was transformed into the methylation-  
239 deficient strain ET12567 with a non-transmissible helper plasmid, pUZ8002, and conjugated  
240 into *S. coelicolor* M600 as described by Kieser et al. [33]. The exconjugants were selected by an  
241 overlay of 50 µg/mL of apramycin.

242

#### 243 *Time course of the overexpression strain*

244 Supplemented minimal medium (SMM) was inoculated with approximately  $5 \times 10^7$  spores/mL  
245 of a spore stock. The culture was grown at 30°C to early exponential phase, which  
246 corresponded to a cell density of  $OD_{450} \sim 0.5$ . A reference sample, designated “0 min,” was  
247 harvested. To induce transcription of SCO3450, thiostrepton was added to the culture to a final  
248 concentration of 30 µg/mL. Samples of the culture were harvested 15, 30, 45, 60, and 90  
249 minutes after induction of SCO3450.

250

#### 251 *Extraction of total RNA from the overexpression strain*

252 Samples of cells from liquid cultures were recovered by filtration on Whatman filter paper (15-  
253 20 mm diameter; catalog #1002 055). RNA was isolated using the modified Kirby mix protocol  
254 as described previously [34] with the following modifications: Harvested volumes ranged  
255 between 5 mL and 20 mL, depending on the cell densities. RNA samples were treated only once  
256 with DNase I (50-70 units; RNase-free, Invitrogen) for 15 minutes at room temperature.

257

258 *DNA microarray experiments for the overexpression strain*

259 Samples of cDNA were synthesized from total RNA as described previously [34]. cDNA of the  
260 reference sample was labeled with Cy3-CTP. cDNAs of the samples isolated at subsequent time  
261 points were labeled with Cy5-CTP. The cDNAs were hybridized to microarrays as described  
262 previously [34].

263

264 *Identification of -35 and -10 conserved promoter regions in the regulon of the ECF sigma factor*

265 The tool PromoterHunter [21] was used to examine DNA upstream of the genes in the regulon  
266 of the ECF sigma factor. Weight matrices corresponding to AAC for the -35 promoter region and  
267 CG for the -10 promoter region were used, because they reflect the conserved promoter  
268 regions of the subgroup ECF01 of ECF sigma factors [14]. A global G + C content of 72% was  
269 used. The space between the -35 and -10 regions was specified to be between 17 to 21 base  
270 pairs. Initially DNA segments of 300 base pairs were examined for isolated genes and genes  
271 located at the beginning of likely operons. Visual inspection of sequences returned by  
272 PromoterHunter identified AACGG and CG as possible consensus sequences for the -35 and -10  
273 promoter regions, respectively. PromoterHunter was used to search for these conserved  
274 sequences within DNA segments of 1000 base pairs upstream of all of the genes in the regulon,  
275 in order to ensure that all instances of the sequences were identified.

276

277 **Acknowledgements**

278 We thank Thomas M. Privalsky for informing us about bioinformatic tools and Mark J. Buttner  
279 and David A. Hopwood for discussions about the data.

280

281 **Author Contributions**

282 C.M.K. conceived the experiments. D.W. designed the experiments that compared the genomes  
283 of the six *Streptomyces* strains and performed those experiments with J.A.V., M.L.H., and K.G.P.  
284 N.K. designed the experiment overexpressing the ECF sigma factor and performed the  
285 experiment with S.A.G. C.M.K. conducted the recent bioinformatic analyses and wrote the  
286 manuscript.

287

288 **References**

- 289 1. Hopwood DA. 2007. *Streptomyces* in nature and medicine: the antibiotic makers. Oxford  
290 University Press, New York, NY.
- 291 2. Kutzner HJ, Waksman SA. 1959. *Streptomyces coelicolor* Mueller and *Streptomyces*  
292 *violaceoruber* Waksman and Curtis, two distinctly different organisms. *J Bacteriol*  
293 78:528—538.
- 294 3. Bentley SD, Chater KF, Cerdeño-Tárraga AM, Challis GL, Thomson NR, James KD, Harris  
295 DE, Quail MA, Kieser H, Harper D, Bateman A, Brown S, Chandra G, Chen CW, Collins M,  
296 Cronin A, Fraser A, Goble A, Hidalgo J, Hornsby T, Howarth S, Huang CH, Kieser T, Larke



- 297 L, Murphy L, Oliver K, O’Neil S, Rabbinowitsch E, Rajandream MA, Rutherford K, Rutter  
298 S, Seeger K, Saunders D, Sharp S, Squares R, Squares S, Taylor K, Warren T, Wietzorrek A,  
299 Woodward J, Barrell BG, Parkhill J, Hopwood DA. 2002. Complete genome sequence of  
300 the model actinomycete *Streptomyces coelicolor* A3(2). *Nature* 417:141—147.
- 301 4. Hopwood DA. 1999. Forty years of genetics with *Streptomyces*: from *in vivo* through *in*  
302 *vitro* to *in silico*. *Microbiology* 145:2183—2202.
- 303 5. Sermonti G, Spada-Sermonti I. 1955. Genetic recombination in *Streptomyces*. *Nature*  
304 176:121.
- 305 6. Bradley SG. 1960. Reciprocal crosses in *Streptomyces coelicolor*. *Genetics* 45:613—619.
- 306 7. Lomovskaya ND, Mkrtumian NM, Gostimskaya NL, Danilenko VN. 1972. Characterization  
307 of temperate actinophage phi C31 isolated from *Streptomyces coelicolor* A3(2). *J Virol*  
308 9:258—262.
- 309 8. Kieser T, Hopwood DA, Wright HM, Thompson CJ. 1982. pIJ101, a multi-copy broad host-  
310 range *Streptomyces* plasmid: functional analysis and development of DNA cloning  
311 vectors. *Mol Gen Genet* 185:223—228.
- 312 9. Aguilar A, Hopwood DA. 1982. Determination of methylenomycin A synthesis by the  
313 pSV1 plasmid from *Streptomyces violaceus-ruber* SANK 95570. *J Gen Microbiol*  
314 128:1893—901.
- 315 10. Weaver D. 2005. PhD thesis. Stanford University, Stanford, CA. Genome plasticity in  
316 *Streptomyces coelicolor*.

- 317 11. Jayapal KP, Lian W, Glod F, Sherman DH, Hu WS. 2007. Comparative genomic  
318 hybridizations reveal absence of large *Streptomyces coelicolor* genomic islands in  
319 *Streptomyces lividans*. BMC Genomics 8:229.
- 320 12. Feklístov A, Sharon BD, Darst SA, Gross CA. 2014. Bacterial sigma factors: a historical,  
321 structural, and genomic perspective. Annu Rev Microbiol 68:357—376.
- 322 13. Lonetto MA, Brown KL, Rudd KE, Buttner MJ. 1994. Analysis of the *Streptomyces*  
323 *coelicolor* sigE gene reveals the existence of a subfamily of eubacterial RNA polymerase  
324 sigma factors involved in the regulation of extracytoplasmic functions. Proc Natl Acad  
325 Sci U S A 91:7573—7577.
- 326 14. Staroń A, Sofia HJ, Dietrich S, Ulrich LE, Liesegang H, Mascher T. 2009. The third pillar of  
327 bacterial signal transduction: classification of the extracytoplasmic function (ECF)  $\sigma$   
328 factor protein family. Mol Microbiol 74:557—581.
- 329 15. ECFfinder. <http://ecf.g2l.bio.uni-goettingen.de:8080/ECFfinder/>.
- 330 16. Takano E, White J, Thompson CJ, Bibb MJ. 1995. Construction of thiostrepton-inducible,  
331 high-copy-number expression vectors for use in *Streptomyces* spp. Gene 166:133—137.
- 332 17. Huang J, Lih CJ, Pan KH, Cohen SN. 2001. Global analysis of growth phase responsive  
333 gene expression and regulation of antibiotic biosynthetic pathways in *Streptomyces*  
334 *coelicolor* using DNA microarrays. Genes Dev 15:3183—3192.
- 335 18. Grass G, Grosse C, Nies DH. 2000. Regulation of the *cnr* cobalt and nickel resistance  
336 determinant from *Ralstonia* sp. strain CH34. J Bacteriol 182:1390—1398.

- 337 19. Tibazarwa C, Wuertz S, Mergeay M, Wyns L, van der Lelie D. 2000. Regulation of the *cnr*  
338 cobalt and nickel resistance determinant of *Ralstonia eutropha* (*Alcaligenes eutrophus*)  
339 CH34. J Bacteriol 182:1399—1409.
- 340 20. Jeong Y, Kim JN, Kim MW, Bucca G, Cho S, Yoon YJ, Kim BG, Roe JH, Kim SC, Smith CP,  
341 Cho BK. 2016. The dynamic transcriptional and translational landscape of the model  
342 antibiotic producer *Streptomyces coelicolor* A3(2). Nat Commun 7:11605.
- 343 21. Klucar L, Stano M, Hajduk M. 2010. phiSITE: database of gene regulation in  
344 bacteriophages. Nucleic Acids Res 38:D366—D370.
- 345 22. Kersey PJ, Allen JE, Allot A, Barba M, Boddu S, Bolt BJ, Carvalho-Silva D, Christensen M,  
346 Davis P, Grabmueller C, Kumar N, Liu Z, Maurel T, Moore B, McDowall MD, Maheswari  
347 U, Naamati G, Newman V, Ong CK, Paulini M, Pedro H, Perry E, Russell M, Sparrow H,  
348 Tapanari E, Taylor K, Vullo A, Williams G, Zadissia A, Olson A, Stein J, Wei S, Tello-Ruiz M,  
349 Ware D, Luciani A, Potter S, Finn RD, Urban M, Hammond-Kosack KE, Bolser DM, De  
350 Silva N, Howe KL, Langridge N, Maslen G, Staines DM, Yates A. 2018. Ensembl Genomes  
351 2018: an integrated omics infrastructure for non-vertebrate species. Nucleic Acids Res  
352 46:D802—D808.
- 353 23. The UniProt Consortium. 2017. UniProt: the universal protein knowledgebase. Nucleic  
354 Acids Res 45:D158—D169.
- 355 24. Koonin EV, Tatusov RL. 1994. Computer analysis of bacterial haloacid dehalogenases  
356 defines a large superfamily of hydrolases with diverse specificity: application of an  
357 iterative approach to database search. J Mol Biol 244:125—132.

- 358 25. Janssen DB, Oppentocht JE, Poelarends GJ. 2001. Microbial dehalogenation. *Curr Opin*  
359 *Biotechnol* 12:254—258.
- 360 26. van Pée KH. 1996. Biosynthesis of halogenated metabolites by bacteria. *Annu Rev*  
361 *Microbiol* 50:375—399.
- 362 27. Rezanka T, Spizek J. 2003. Halogen-containing antibiotics from Streptomyces, p 309—  
363 353. *In* Atta-ur-Rahman (ed), *Studies in natural products chemistry*, 1<sup>st</sup> ed, vol 29.  
364 Elsevier Science.
- 365 28. Dobson L, Reményi R, Tusnády GE. 2015. CCTOP: a Consensus Constrained TOPology  
366 prediction web server. *Nucleic Acids Res* 43:W408—W412.
- 367 29. Finn RD, Attwood TK, Babbitt PC, Bateman A, Bork P, Bridge AJ, Chang HY, Dosztányi Z,  
368 El-Gebali S, Fraser M, Gough J, Haft D, Holliday GL, Huang H, Huang X, Letunic I, Lopez R,  
369 Lu S, Marchler-Bauer A, Mi H, Mistry J, Natale DA, Necci M, Nuka G, Orengo CA, Park Y,  
370 Pesseat S, Piovesan D, Potter SC, Rawlings ND, Redaschi N, Richardson L, Rivoire C,  
371 Sangrador-Vegas A, Sigrist C, Sillitoe I, Smithers B, Squizzato S, Sutton G, Thanki N,  
372 Thomas PD, Tosatto SC, Wu CH, Xenarios I, Yeh LS, Young SY, Mitchell AL. 2017. InterPro  
373 in 2017--beyond protein family and domain annotations. *Nucleic Acids Res* 45:D190—  
374 D199.
- 375 30. Temuujin U, Chi WJ, Lee SY, Chang YK, Hong SK. 2011. Overexpression and biochemical  
376 characterization of DagA from *Streptomyces coelicolor* A3(2): an endo-type  $\beta$ -agarase  
377 producing neoagarotetraose and neoagarohexaose. *Appl Microbiol Biotechnol* 92:749—  
378 759.

- 379 31. Bibb MJ, Jones GH, Joseph R, Buttner MJ, Ward JM. 1987. The agarase gene (*dagA*) of  
380 *Streptomyces coelicolor* A3(2): affinity purification and characterization of the cloned  
381 gene product. *J Gen Microbiol* 133:2089—2096.
- 382 32. Huang J, Shi J, Molle V, Sohlberg B, Weaver D, Bibb MJ, Karoonuthaisiri N, Lih CJ, Kao  
383 CM, Buttner MJ, Cohen SN. 2005. Cross-regulation among disparate antibiotic  
384 biosynthetic pathways of *Streptomyces coelicolor*. *Mol Microbiol* 58:1276—1287.
- 385 33. Kieser T, Bibb MJ, Buttner, MJ, Chater KF, Hopwood DA. 2000. Practical *Streptomyces*  
386 genetics. John Innes Foundation.
- 387 34. Weaver D, Karoonuthaisiri N, Tsai HH, Huang CH, Ho ML, Gai S, Patel KG, Huang J, Cohen  
388 SN, Hopwood DA, Chen CW, Kao CM. 2004. Genome plasticity in *Streptomyces*:  
389 identification of 1 Mb TIRs in the *S. coelicolor* A3(2) chromosome. *Mol Microbiol*  
390 51:1535—1550.

391

392 **FIG 1** Genomic Island 6 and the regulon of the ECF sigma factor encoded by SCO3450. GI 6 is  
393 108 kb in length. The arrow indicates the location of SCO3450, which encodes a putative ECF  
394 sigma factor. See Table 1 for a list of the strains used to identify GI 6. To obtain the data in the  
395 figure, we used DNA microarrays that contained the 7825 predicted genes in the chromosome  
396 of *S. coelicolor* M145 [17]. For the left-hand columns, the maximum intensity of green  
397 corresponds to a 3-fold difference in signal on the microarrays for DNA in *S. coelicolor* M145  
398 relative to DNA in the wild type strains. SCO3450 was overexpressed in an exponentially  
399 growing liquid culture (SMM) of a *S. coelicolor* M600 derivative, through the use of a  
400 thiostrepton-inducible promoter [16]. RNA was harvested from the culture immediately prior to

401 the addition of thiostrepton and every 15 to 30 minutes afterwards for 90 minutes. cDNA of the  
402 initial RNA sample (OD<sub>450</sub> ~ 0.5) was labeled with the green fluorescent dye Cy3. cDNA of RNA  
403 isolated from subsequent time points was labeled with the red fluorescent dye Cy5. Yellow  
404 microarray spots for a particular time point represented genes with transcript levels equal to  
405 the levels of the initial time point. Red and green microarray spots represented genes induced  
406 and repressed, respectively, after the addition of thiostrepton. The yellow color is shown here  
407 as black for clarity. For the right-hand columns, the maximum intensity of red corresponds to 8-  
408 fold induction of a given gene at a particular time relative to the beginning of the time course. A  
409 control experiment with a M600 derivative that lacks SCO3450 in the induction plasmid  
410 identified genes induced by thiostrepton. Labels on the right indicate ORF numbers and genes  
411 with names.

412

413 **FIG 2** Alignment of putative promoters in the regulon of the ECF sigma factor encoded by  
414 SCO3450. Red letters indicate the putative -35 and -10 promoter regions. On the right-hand  
415 side, the numbers in parentheses indicate the distance between each -10 promoter region and  
416 the start codon of the respective gene.

417

418 **Table 1. Strains that revealed the genomic islands of *S. coelicolor* M145.**

| Strain | Comment                                                        | Ref. |
|--------|----------------------------------------------------------------|------|
| M145   | <i>S. coelicolor</i> sequenced "reference" strain, SCP1- SCP2- | [3]  |
| 1152   | <i>S. coelicolor</i> Sermonti's SE1                            | [5]  |
| 1153   | <i>S. coelicolor</i> Bradley's S199 strain                     | [6]  |
| 1326   | <i>S. lividans</i> 66                                          | [7]  |

|      |                                                                                                   |     |
|------|---------------------------------------------------------------------------------------------------|-----|
| 2896 | <i>S. lividans</i> ISP5434-, the strain from which pIJ101 was isolated                            | [8] |
| 3034 | <i>S. violaceroruber</i> SANK95570, harbors pSV1, which encodes methylenomycin biosynthetic genes | [9] |

419

420

**Table 2. Types of enzymes encoded by the regulon of the ECF sigma factor.**

| Type                                   | Gene    | AA  | Putative Function                                                                                     | Other feature |
|----------------------------------------|---------|-----|-------------------------------------------------------------------------------------------------------|---------------|
| <b>CLEAVAGE</b>                        |         |     |                                                                                                       |               |
| Glycoside hydrolase                    | SCO3444 | 617 | glycoside hydrolase family 15/phosphorylase b kinase regulatory chain family; six-hairpin glycosidase |               |
| Nucleoside phosphorylase               | SCO3463 | 262 | nucleoside phosphorylase domain                                                                       |               |
| Dehalogenase                           | SCO3446 | 225 | haloacid dehydrogenase (HAD)-like domain                                                              |               |
| <b>REDOX</b>                           |         |     |                                                                                                       |               |
| Glutaredoxin                           | SCO3442 | 114 | glutaredoxin (DNA synthesis?)                                                                         |               |
| Oxidoreductase                         | SCO3443 | 454 | pyridine nucleotide-disulphide oxidoreductase; dihydrolipoyl dehydrogenase?                           |               |
|                                        | SCO3460 | 505 | pyridine nucleotide-disulphide oxidoreductase; dihydrolipoamide dehydrogenase?                        |               |
| Dehydrogenase                          | SCO3478 | 344 | D-isomer specific 2-hydroxyacid dehydrogenase                                                         |               |
| <b>TRANSFER</b>                        |         |     |                                                                                                       |               |
| Methyltransferase                      | SCO3452 | 359 | S-adenosyl-L-methionine-dependent methyltransferase                                                   |               |
|                                        | SCO3459 | 287 | S-adenosyl-L-methionine-dependent methyltransferase                                                   |               |
| Phosphatidyltransferase?               | SCO3457 | 205 | CDP-alcohol phosphatidyltransferase; YnjF?                                                            | transmembrane |
| Nucleotide-diphospho-sugar transferase | SCO3464 | 210 | nucleotide-diphospho-sugar transferases; transferase 1, rSAM/selenodomain-associated                  |               |
|                                        | SCO3465 | 236 | nucleotide-diphospho-sugar transferase; transferase 2, rSAM/selenodomain-associated                   |               |
| <b>MISC</b>                            |         |     |                                                                                                       |               |
| Enzyme?                                | SCO3445 | 55  | low to moderate homology to small regions of seven larger proteins, which include enzymes             | membrane      |

421 AA = amino acids

422

## 423 **Legends for Supplemental Material**

424 **FIG S1** Genomic Islands 1 to 10 of *S. coelicolor* M145. Only the genomic islands are shown and  
425 not the entire chromosome. Table 1 lists the strains used. To obtain these data, we used DNA  
426 microarrays that contained the 7825 predicted genes in the chromosome of *S. coelicolor* M145  
427 [17]. Genomic DNA from *S. coelicolor* M145 was used as the reference sample and labeled with  
428 the green fluorescent dye Cy3. Genomic DNA samples from the five wild type strains each were  
429 labeled with the red fluorescent dye Cy5. The labeled DNA of each wild type strain was mixed  
430 with the labeled DNA of *S. coelicolor* M145 and hybridized to a microarray. Yellow spots on the  
431 microarrays represented genes at equal copy numbers between *S. coelicolor* M145 and the  
432 other strains. Green spots represented genes present in *S. coelicolor* M145 but absent in the  
433 other strains. Red spots represented genes at higher copy numbers in the strains relative to *S.*  
434 *coelicolor* M145. The yellow color is shown here as black for clarity. The maximum intensity of  
435 green corresponds to a 3-fold difference in signal on the microarrays for DNA in *S. coelicolor*  
436 M145 relative to DNA in the wild type strains. The green bars to the left of the GIs designate  
437 horizontally transferred genes in the genome sequence of *S. coelicolor* M145 that were  
438 predicted by Bentley et al. [3]. Regions of GIs not predicted by Bentley et al. lack a bar. Labels  
439 on the right indicate ORF numbers and genes with names.

440

441 **FIG S2** Genomic Islands 11 to 18 of *S. coelicolor* M145. See the text of Fig. S1.

442



443 **FIG S3** Genomic Islands 19 to 22 of *S. coelicolor* M145. See the text of Fig. S1.

444

445 **FIG S4** The region of the *S. coelicolor* M145 chromosome that contains the regulon of the ECF  
446 sigma factor. The figure was obtained from EnsemblBacteria [22]. SCO3478 is not shown.

447

448 **FIG S5** Result from CCTOP for the putative anti-sigma factor encoded by SCO3451. The putative  
449 anti-sigma factor is predicted to contain one transmembrane domain. The data were obtained  
450 from the Constrained Consensus TOPology (CCTOP) prediction server [28].

451

452 **FIG S6** Predicted zinc finger in the putative anti-sigma factor encoded by SCO3451. The data  
453 were obtained from UniProt [23].

454

455 **FIG S7** Predicted zinc finger in the putative anti-sigma factor encoded by SCO3449. The data  
456 were obtained from UniProt [23].

457

458 **Table S1. Annotations of the regulon of the ECF Sigma Factor encoded by SCO3450.**

459 Annotations were obtained from EnsemblBacteria [22] and UniProt [23]. For the UniProt

460 BLASTs, parentheses denote genera and percent identities of similar proteins. Red text denotes

461 putative enzymes. Blue text denotes proteins with homology to small regions of larger proteins.

462

463 **Table S2. Annotations of Genomic Island 6, excluding the regulon of the ECF sigma factor**

464 **encoded by SCO3450.** Annotations were obtained from EnsemblBacteria [22] and UniProt [23].

465 For the UniProt BLASTs, parentheses denote genera and percent identities of similar proteins.

466 Red text denotes putative enzymes. Blue text denotes proteins with homology to small regions

467 of larger proteins. See the text for additional details.

468

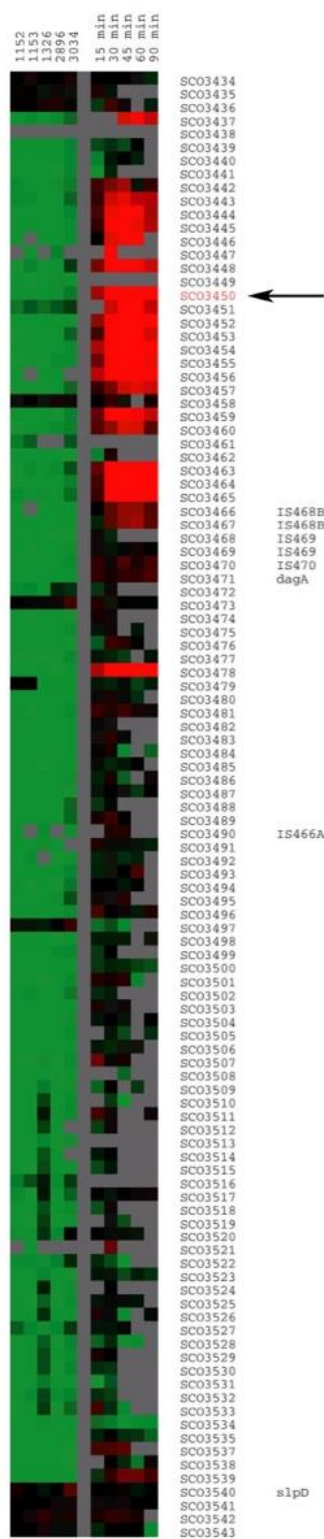

469

470 **FIG 1** Genomic Island 6 and the regulon of the ECF sigma factor encoded by SCO3450.

```
SCO3437-1 CGTTGCCGACAACGGGATGATGATCCTCGG--CGACCTCAACCA (694 bp)
SCO3437-2 CGTCGCCGACAACGGGATGATGATCCTCGG--CGACCTCAACCA (283 bp)
SCO3438 CAGGTCCCCGAAACGGCGCACCCCTCGTGGGC--CGGTGCCCGCGG (178 bp)
SCO3442 GTGGTGGTGGAACGGCACCTGGCTGCCGCAGTCCGTGCCGCCCG (407 bp)
SCO3443 CGACCAGGCCAACGGCGCGCTACCTCGCCACGACGCCGACCCGG (158 bp)
SCO3445 ACGGCCTGGAAACGGCGTGCTCCTGAGCCGC-CGTGCGTCAATG ( 7 bp)
SCO3448 TCGATGGCGAAACGGACGAGGTCACCGCACGCCGGGTCGCGGCC (295 bp)
SCO3451 TTCCCGTCGAAACGGTCGATGGCCCGGTAGGCGCGCAGCAAGGT (312 bp)
SCO3455-1 GGTGTGGGTCAACGGAGAGAACTTCCGCAC--CGGAAAGCAGGC (883 bp)
SCO3455-2 CTGGACCAGGAACGGCTGCCCGAGCAGTGG--CGAGAGAAGTTC (150 bp)
SCO3456 GTTTCGCGCGAACGGATGTTTCGCGGGACCGTCCGCGGGAAACA ( 50 bp)
SCO3457 GTTGCGCGGAAACGGAACACGGCCGGGTGCT-CGCAGGCTTCCC ( 58 bp)
SCO3458 GCGTGTCCGAAACGGAATGCGTGACCAGCC--CGGCAGGGTTCC (844 bp)
SCO3459 GTCGCTGGTCAACGGCCCGCTCTCGACCAGGCCGGGGATCGGCA (611 bp)
SCO3462 CCGAGGCCGTAACGGCCCTCTGGTTTCTCGCCCGGCCCCGCTCC (276 bp)
SCO3463 CCACCCGAGAACGGAACCCTCGTCCCCGCCTCGTACAGCACG (145 bp)
```

471

-35

-10

472 **FIG 2** Alignment of putative promoters in the regulon of the ECF sigma factor encoded by

473 SCO3450.
